# Supplementary material for: Evaluation of a short training course of chest X-ray interpretation for the diagnosis of paediatric TB
Source: PubMed Central journal article supplement (PMC11221594; doi:10.5588/ijtldopen.23.0484), 2024-02-01
Supplement: iutld_ijtld_open_23.0484_supplementarydata1.pdf [file iutld_ijtld_open_23.0484_supplementarydata1.pdf]

## **Evaluation of a short training course of chest X-ray interpretation for the diagnosis of paediatric TB**

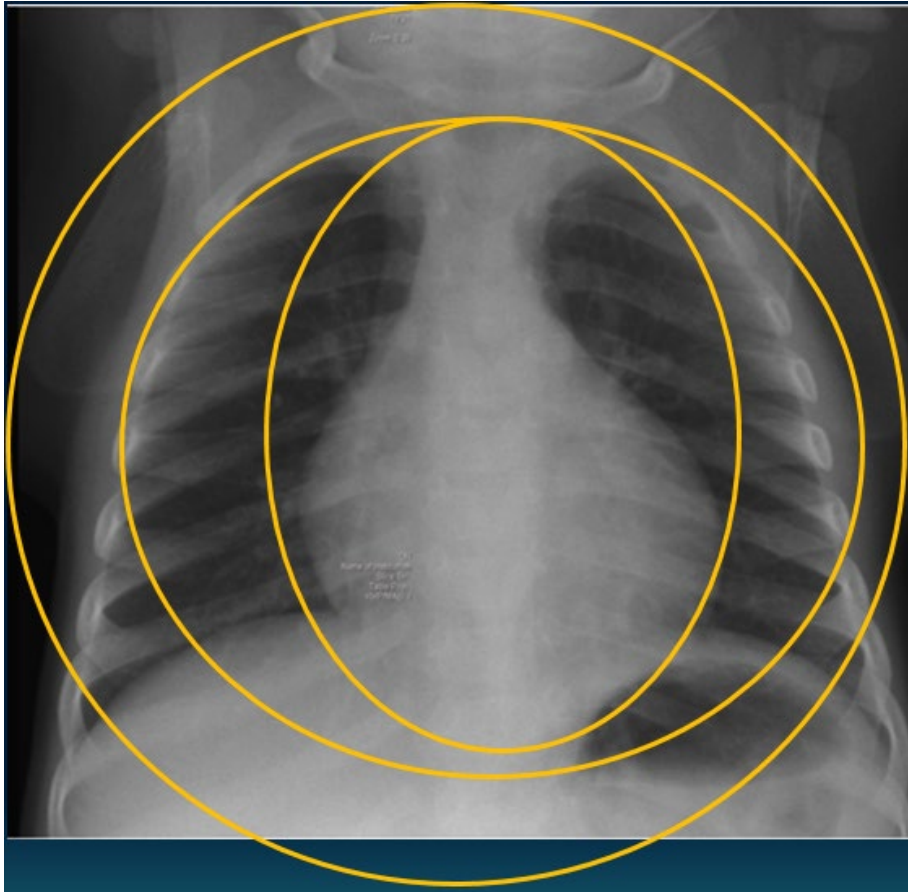

**Supplementary Figure S1:** Systematic approach with the three-circle method

**Supplementary Table S1:** Description of the Chest X- Rays used for the pre- and post-training assessments

| <b>Training slides</b>               | <b>CXR features</b>                                          | <b>CXR Classification according TB Speed training Module</b> |
|--------------------------------------|--------------------------------------------------------------|--------------------------------------------------------------|
| <b>Slide 1 (AP and lateral CXR)</b>  | Lymphadenopathies                                            | Abnormal; suggestive of TB                                   |
| <b>Slide 2 (AP and lateral CXR)</b>  | Normal CXR without thymus                                    | Normal; Not TB                                               |
| <b>Slide 3 (AP and lateral CXR)</b>  | Lymphadenopathies                                            | Abnormal; suggestive of TB                                   |
| <b>Slide 4 (AP and lateral CXR)</b>  | Alveolar Opacities                                           | Abnormal; suggestive of TB                                   |
| <b>Slide 5 (AP and lateral CXR)</b>  | Alveolar Opacity + Cavitation                                | Abnormal; suggestive of TB                                   |
| <b>Slide 6 (AP)</b>                  | Badly inspired film                                          | Unreadable                                                   |
| <b>Slide 7 (AP and lateral CXR)</b>  | Lymphadenopathies +Alveolar Opacities                        | Abnormal; suggestive of TB                                   |
| <b>Slide 8 (AP and lateral CXR)</b>  | Opacities alveolar + Lymphadenopathies                       | Abnormal; suggestive of TB                                   |
| <b>Slide 9 (AP and lateral CXR)</b>  | Alveolar opacities                                           | Abnormal; suggestive of TB                                   |
| <b>Slide 10 (AP and lateral CXR)</b> | Atelectasis + Lymphadenopathies                              | Abnormal; suggestive of TB                                   |
| <b>Slide 11 (AP CXR)</b>             | Pleurisy                                                     | Abnormal; suggestive of TB                                   |
| <b>Slide 12 (AP and lateral CXR)</b> | Miliary                                                      | Abnormal; suggestive of TB                                   |
| <b>Slide 13 (AP and lateral CXR)</b> | Atelectasis + Lymphadenopathies                              | Abnormal; suggestive of TB                                   |
| <b>Slide 14 (AP and lateral CXR)</b> | Normal view with thymus                                      | Normal, not TB                                               |
| <b>Slide 15 (AP and lateral CXR)</b> | Lymphadenopathies                                            | Abnormal; suggestive of TB                                   |
| <b>Slide 16 (AP CXR)</b>             | Badly penetrated film                                        | Unreadable                                                   |
| <b>Slide 17 (AP CXR)</b>             | Alveolar Opacities + cavity within the alveolar opacity      | Abnormal; suggestive of TB                                   |
| <b>Slide 18 (AP CXR)</b>             | Alveolar Opacities + Lymphadenopathies + Airways compression | Abnormal; suggestive of TB                                   |
| <b>Slide 19 (AP CXR)</b>             | Pericarditis                                                 | Abnormal; suggestive of TB                                   |
| <b>Slide 20 (AP CXR)</b>             | Normal view with thymus                                      | Normal; not TB                                               |

AP antero-posterior; PA : postero anterior; CXR: Chest – X- ray; TB :Tuberculosis

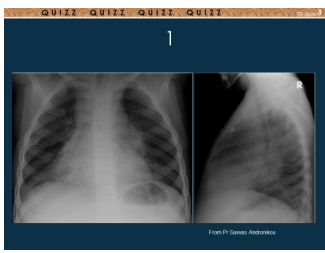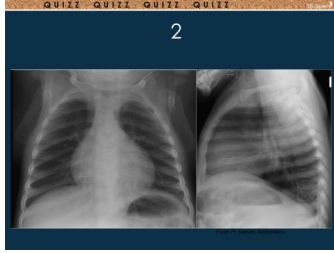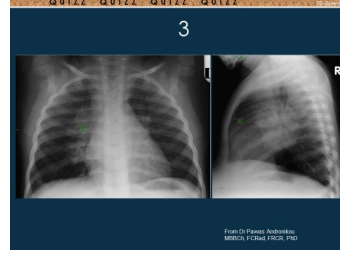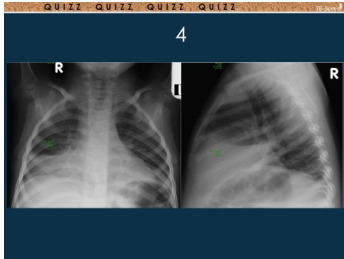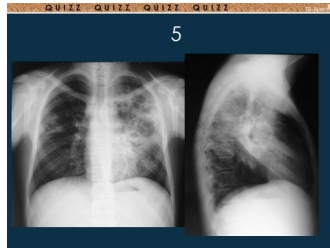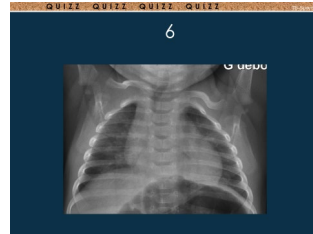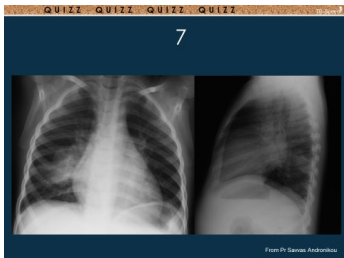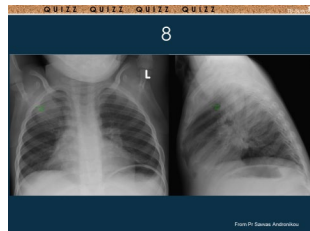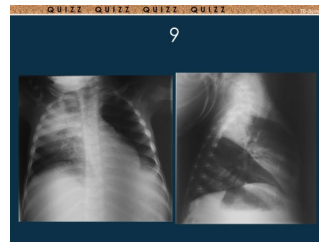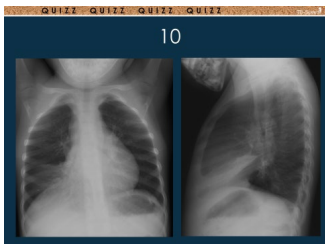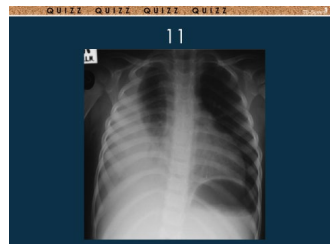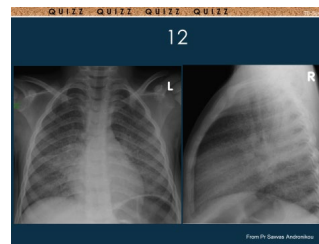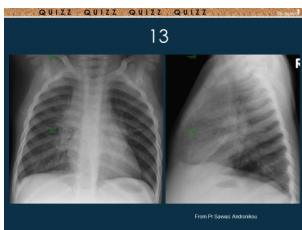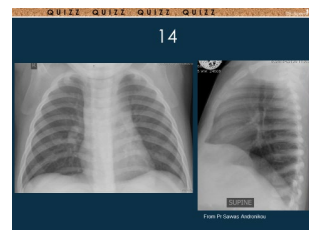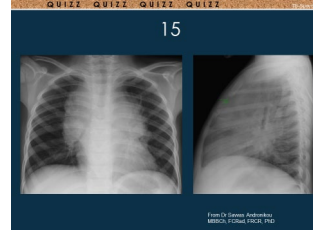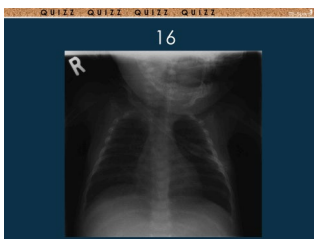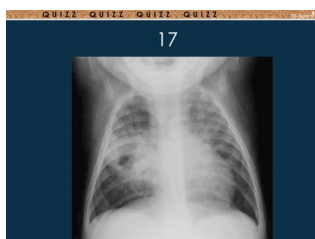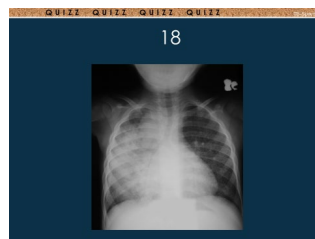

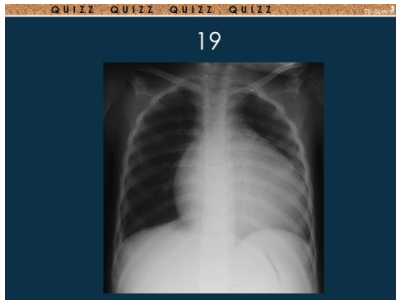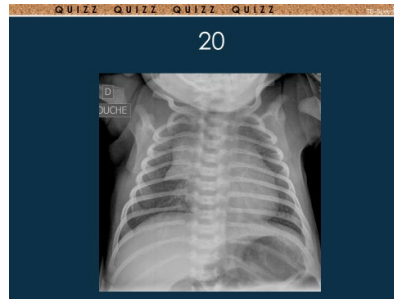

**Supplementary Figure S2**: Set of 20 chest X-rays used for the pre- and post-training assessments

**Supplementary Table S2:** Characteristics of the course participants by country

| Characteristics                                   | Cambodia,<br>N = 34 | Cameroon,<br>N = 32 | Ivory Coast,<br>N = 39 | Sierra Leone,<br>N = 37 | Uganda,<br>N = 49 | Overall,<br>N = 191 |
|---------------------------------------------------|---------------------|---------------------|------------------------|-------------------------|-------------------|---------------------|
| Age, median (IQR)                                 | 40 (30, 49)         | 34 (30, 42)         | 37 (32, 44)            | NA                      | 37 (31, 42)       | 37 (31, 45)         |
| Sex, n (%)                                        |                     |                     |                        |                         |                   |                     |
| Female                                            | 9 (26.5)            | 16 (50.0)           | 4 (10.3)               | 12 (40.0)               | 23 (47.9)         | 64 (35.0)           |
| Male                                              | 25 (73.5)           | 16 (50.0)           | 35 (89.7)              | 18 (60.0)               | 25 (52.1)         | 119 (65.0)          |
| Place of Work, n (%)                              |                     |                     |                        |                         |                   |                     |
| District Hospital                                 | 10 (29.4)           | 25 (80.0)           | 14 (35.9)              | 10 (34.5)               | 19 (42.2)         | 78 (43.5)           |
| Primary Health Centre                             | 24 (70.6)           | 6 (20.0)            | 25 (64.1)              | 19 (65.5)               | 26 (57.8)         | 100 (56.5)          |
| Previous experience interpreting CXR, n (%)       | 9 (26.5)            | 16 (55.2)           | 11 (28.2)              | 8 (26.7)                | 1 (2.0)           | 45 (24.9)           |
| CXR interpreted last month before training, n (%) | 1 (2.9)             | 9 (31.0)            | 12 (30.8)              | 1 (2.8)                 | 0 (0)             | 23 (16.7)           |
| Position, n (%)                                   |                     |                     |                        |                         |                   |                     |
| Medical Doctor                                    | 6 (17.6)            | 14 (43.8)           | 11 (28.2)              | 8 (21.6)                | 4 (8.2)           | 43 (22.5)           |
| Nurse                                             | 16 (47.1)           | 12 (37.5)           | 23 (59.0)              | 11 (29.7)               | 41 (83.7)         | 103 (53.9)          |
| Radiology Technician                              | 4 (11.8)            | 4 (12.5)            | 4 (10.3)               | 5 (13.5)                | 1 (2.0)           | 18 (9.4)            |
| Others                                            | 7 (20.6)            | 2 (6.3)             | 1 (2.6)                | 0 (0.0)                 | 2 (4.1)           | 12 (6.3)            |
| Not specify                                       | 1 (2.9)             | 0 (0.0)             | 0 (0.0)                | 13 (35.1)               | 1 (2.0)           | 15 (7.9)            |

CXR: chest x-ray

**Supplementary Table S3:** Results of the pre- and post-training assessment by participant's profession and countries

| Characteristic        | Medical Doctor               |                               |                      | Nurse                          |                                 |                      | Radiology Technician         |                               |                      | Others                       |                               |                      | Not specify                  |                           |                      |
|-----------------------|------------------------------|-------------------------------|----------------------|--------------------------------|---------------------------------|----------------------|------------------------------|-------------------------------|----------------------|------------------------------|-------------------------------|----------------------|------------------------------|---------------------------|----------------------|
|                       | Pre-training<br>, N =<br>780 | Post-training<br>, N =<br>780 | p-value <sup>1</sup> | Pre-training<br>, N =<br>1,140 | Post-training<br>, N =<br>1,140 | p-value <sup>1</sup> | Pre-training<br>, N =<br>340 | Post-training<br>, N =<br>340 | p-value <sup>1</sup> | Pre-training<br>, N =<br>180 | Post-training<br>, N =<br>180 | p-value <sup>2</sup> | Pre-training<br>, N =<br>400 | Post-training,<br>N = 400 | p-value <sup>1</sup> |
| Cambodia, n/N (%)     | 85/120<br>(70.8)             | 108/120<br>(90.0)             | <0.001               | 142/220<br>(64.5)              | 177/220<br>(80.5)               | <0.001               | 60/80<br>(75.0)              | 67/80<br>(83.8)               | 0.2                  | 65/120<br>(54.2)             | 88/120<br>(73.3)              | 0.002                | 72/140<br>(51.4)             | 106/140<br>(75.7)         | <0.001               |
| Cameroon, n/N (%)     | 211/280<br>(75.4)            | 237/280<br>(84.6)             | 0.006                | 136/240<br>(56.7)              | 190/240<br>(79.2)               | <0.001               | 68/80<br>(85.0)              | 66/80<br>(82.5)               | 0.7                  | 24/40<br>(60.0)              | 29/40<br>(72.5)               | 0.2                  | NA                           | NA                        | -                    |
| Ivory coast, n/N (%)  | 161/220<br>(73.2)            | 187/220<br>(85.0)             | 0.002                | 290/460<br>(63.0)              | 365/460<br>(79.3)               | <0.001               | 63/80<br>(78.8)              | 73/80<br>(91.3)               | 0.027                | 17/20<br>(85.0)              | 18/20<br>(90.0)               | >0.9                 | NA                           | NA                        | -                    |
| Sierra Leone, n/N (%) | 87/160<br>(54.4)             | 115/160<br>(71.9)             | 0.001                | 128/220<br>(58.2)              | 167/220<br>(75.9)               | <0.001               | 69/100<br>(69.0)             | 83/100<br>(83.0)              | 0.020                | NA                           | NA                            |                      | 165/260<br>(63.5)            | 201/260<br>(77.3)         | <0.001               |

<sup>1</sup>Mc Neymar test; NA: Not Applicable

**Supplementary Table S4:** Results of pre- and post-training reading assessment per group of chest X-rays and participants profession

| Characteristics                                                | Medical Doctor                |                               |                      | Nurse                           |                                 |                      | Radiology Technician          |                               |                      | Others                       |                               |                      | Not specify                 |                               |                      |
|----------------------------------------------------------------|-------------------------------|-------------------------------|----------------------|---------------------------------|---------------------------------|----------------------|-------------------------------|-------------------------------|----------------------|------------------------------|-------------------------------|----------------------|-----------------------------|-------------------------------|----------------------|
|                                                                | Pre-trainin<br>g,, N =<br>780 | Post-trainin<br>g, N =<br>780 | p-value <sup>1</sup> | Pre-trainin<br>g,, N =<br>1,140 | Post-trainin<br>g, N =<br>1,140 | p-value <sup>1</sup> | Pre-trainin<br>g,, N =<br>340 | Post-trainin<br>g, N =<br>340 | p-value <sup>1</sup> | Pre-trainin<br>g, N =<br>180 | Post-trainin<br>g, N =<br>180 | p-value <sup>1</sup> | Pre-trainin<br>g,N =<br>400 | Post-trainin<br>g, N =<br>400 | p-value <sup>1</sup> |
| Adenopathies, n( %)                                            | 84<br>(71.8)                  | 95<br>(81.2)                  | 0.090                | 103<br>(60.2)                   | 145<br>(84.8)                   | <0.001               | 43<br>(84.3)                  | 45<br>(88.2)                  | 0.6                  | 17<br>(63.0)                 | 24<br>(88.9)                  | 0.026                | 39<br>(65.0)                | 48<br>(80.0)                  | 0.066                |
| Adenopathies +Alveolar Opacities, n (%)                        | 24<br>(61.5)                  | 30<br>(76.9)                  | 0.14                 | 34<br>(59.6)                    | 54<br>(94.7)                    | <0.001               | 14<br>(82.4)                  | 15<br>(88.2)                  | >0.9                 | 5 (55.6)                     | 8 (88.9)                      | 0.3                  | 10<br>(50.0)                | 18<br>(90.0)                  | 0.006                |
| Alveolar Opacities, n( %)                                      | 34<br>(87.2)                  | 38<br>(97.4)                  | 0.2                  | 39<br>(68.4)                    | 48<br>(84.2)                    | 0.047                | 14<br>(82.4)                  | 15<br>(88.2)                  | >0.9                 | 6 (66.7)                     | 7 (77.8)                      | >0.9                 | 17<br>(85.0)                | 16<br>(80.0)                  | >0.9                 |
| Alveolar Opacities + adenopathies + Airways compression, n (%) | 35<br>(89.7)                  | 38<br>(97.4)                  | 0.4                  | 48<br>(84.2)                    | 54<br>(94.7)                    | 0.067                | 17<br>(100.0)                 | 17<br>(100.0)                 |                      | 7 (77.8)                     | 5 (55.6)                      | 0.6                  | 16<br>(80.0)                | 18<br>(90.0)                  | 0.7                  |
| Alveolar Opacities + cavity within the alveolar opacity, n (%) | 37<br>(94.9)                  | 38<br>(97.4)                  | >0.9                 | 48<br>(84.2)                    | 56<br>(98.2)                    | 0.008                | 17<br>(100.0)                 | 17<br>(100.0)                 |                      | 8 (88.9)                     | 8 (88.9)                      | >0.9                 | 17<br>(85.0)                | 18<br>(90.0)                  | >0.9                 |
| Alveolar Opacity + Cavitation, n (%)                           | 37<br>(94.9)                  | 38<br>(97.4)                  | >0.9                 | 51<br>(89.5)                    | 56<br>(98.2)                    | 0.11                 | 17<br>(100.0)                 | 17<br>(100.0)                 |                      | 6 (66.7)                     | 7 (77.8)                      | >0.9                 | 14<br>(70.0)                | 19<br>(95.0)                  | 0.091                |
| Alveolar opacities, n( %)                                      | 32<br>(82.1)                  | 35<br>(89.7)                  | 0.3                  | 38<br>(66.7)                    | 45<br>(78.9)                    | 0.14                 | 15<br>(88.2)                  | 15<br>(88.2)                  | >0.9                 | 8 (88.9)                     | 6 (66.7)                      | 0.6                  | 14<br>(70.0)                | 15<br>(75.0)                  | 0.7                  |
| Atelectasis + adenopathies, n( %)                              | 54<br>(69.2)                  | 67<br>(85.9)                  | 0.013                | 70<br>(61.4)                    | 102<br>(89.5)                   | <0.001               | 26<br>(76.5)                  | 28<br>(82.4)                  | 0.5                  | 12<br>(66.7)                 | 16<br>(88.9)                  | 0.2                  | 24<br>(60.0)                | 39<br>(97.5)                  | <0.001               |

|                                          |              |               |        |              |              |        |              |               |       |              |              |       |              |               |        |
|------------------------------------------|--------------|---------------|--------|--------------|--------------|--------|--------------|---------------|-------|--------------|--------------|-------|--------------|---------------|--------|
| Badly inspired film, n (%)               | 15<br>(38.5) | 16<br>(41.0)  | 0.8    | 23<br>(40.4) | 23<br>(40.4) | >0.9   | 3 (17.6)     | 10<br>(58.8)  | 0.013 | 5 (55.6)     | 4 (44.4)     | >0.9  | 9 (45.0)     | 6 (30.0)      | 0.3    |
| Badly penetrated film, n (%)             | 33<br>(84.6) | 36<br>(92.3)  | 0.5    | 38<br>(66.7) | 54<br>(94.7) | <0.001 | 16<br>(94.1) | 17<br>(100.0) | >0.9  | 5 (55.6)     | 9<br>(100.0) | 0.082 | 16<br>(80.0) | 16<br>(80.0)  | >0.9   |
| Miliary, n( %)                           | 35<br>(89.7) | 37<br>(94.9)  | 0.7    | 38<br>(66.7) | 51<br>(89.5) | 0.003  | 16<br>(94.1) | 17<br>(100.0) | >0.9  | 6 (66.7)     | 9<br>(100.0) | 0.2   | 13<br>(65.0) | 19<br>(95.0)  | 0.044  |
| Normal view with thymus, n (%)           | 5 (6.4)      | 41<br>(52.6)  | <0.001 | 26<br>(22.8) | 29<br>(25.4) | 0.6    | 5 (14.7)     | 16<br>(47.1)  | 0.004 | 1 (5.6)      | 5 (27.8)     | 0.2   | 4 (10.0)     | 13<br>(32.5)  | 0.014  |
| Normal view without thymus, n (%)        | 23<br>(59.0) | 28<br>(71.8)  | 0.2    | 17<br>(29.8) | 24<br>(42.1) | 0.2    | 11<br>(64.7) | 10<br>(58.8)  | 0.7   | 1 (11.1)     | 2 (22.2)     | >0.9  | 4 (20.0)     | 7 (35.0)      | 0.3    |
| Opacities alveolar + adenopathies, n (%) | 34<br>(87.2) | 36<br>(92.3)  | 0.7    | 43<br>(75.4) | 53<br>(93.0) | 0.010  | 16<br>(94.1) | 17<br>(100.0) | >0.9  | 4 (44.4)     | 9<br>(100.0) | 0.029 | 10<br>(50.0) | 20<br>(100.0) | <0.001 |
| Pericarditis, n( %)                      | 31<br>(79.5) | 35<br>(89.7)  | 0.2    | 42<br>(73.7) | 54<br>(94.7) | 0.002  | 14<br>(82.4) | 16<br>(94.1)  | 0.6   | 9<br>(100.0) | 8 (88.9)     | >0.9  | 16<br>(80.0) | 17<br>(85.0)  | >0.9   |
| Pleurisy, n( %)                          | 31<br>(79.5) | 39<br>(100.0) | 0.005  | 38<br>(66.7) | 51<br>(89.5) | 0.003  | 16<br>(94.1) | 17<br>(100.0) | >0.9  | 6 (66.7)     | 8 (88.9)     | 0.6   | 14<br>(70.0) | 18<br>(90.0)  | 0.2    |

<sup>1</sup>Mc Neymar test
